# Supplementary material for: Why increases in CO2 cool the stratosphere and how this amplifies radiative forcing
Source: Research Square preprint supplement (doi:10.21203/rs.3.rs-7608058/v1), 2025-09-25
Supplement: Supplementary file 1 [file c17141306b90bb487ce880ce.pdf]

1

## 2 **Supporting Information for**

### 3 **Why increases in CO<sub>2</sub> cool the stratosphere and how this amplifies radiative forcing**

4 **Sean Cohen, Robert Pincus, Lorenzo Polvani**

5 **Sean Cohen.**

6 **E-mail: [sean.cohen@columbia.edu](mailto:sean.cohen@columbia.edu)**

#### 7 **This PDF file includes:**

8 Supporting text

9 Figs. S1 to S7

10 Table S1

11 SI References

## Supporting Information Text

### 1. Why tropospheric cooling by CO<sub>2</sub> does not change with CO<sub>2</sub> concentration

When atmospheric CO<sub>2</sub> increases in the absence of any changes in column temperature, the longwave heating rate due to CO<sub>2</sub> changes non-uniformly along the atmospheric column. In the middle and upper stratosphere, the spectrally-integrated heating rate due to CO<sub>2</sub> ( $H_{\text{CO}_2}$ ) increases sharply when CO<sub>2</sub> is quadrupled from preindustrial levels (Fig. S1, right), causing the stratosphere to cool at these pressure levels. In the troposphere and lower stratosphere, however, the spectrally-integrated heating rate due to CO<sub>2</sub> is almost entirely insensitive to changes in CO<sub>2</sub> concentration. This not only causes CO<sub>2</sub>-induced stratospheric cooling to vanish in the lower stratosphere, but also causes longwave cooling by CO<sub>2</sub> in the troposphere to be insensitive to changes in CO<sub>2</sub> concentration (so long as surface temperature and, by extension, tropospheric temperature remain fixed).

This insensitivity of  $H_{\text{CO}_2}$  in the troposphere can be explained by the distribution of CO<sub>2</sub>'s mass absorption coefficients. Near present-day concentrations of CO<sub>2</sub>, tropospheric cooling by CO<sub>2</sub> is dominated by wavenumbers near the edges of the CO<sub>2</sub> band (Fig. S1, left). Here, CO<sub>2</sub>'s mass absorption coefficient falls off roughly exponentially with wavenumber from the center of the CO<sub>2</sub> band (see Fig. 2 in the main text) such that the number of wavenumbers near unity optical depth at any given pressure level is largely insensitive to CO<sub>2</sub> concentration. When atmospheric CO<sub>2</sub> rises, any increase in the spectrally-resolved longwave cooling rate is met by an equal and opposite decrease in the spectrally-resolved longwave cooling rate at other wavenumbers. This tropospheric invariance of  $H_{\text{CO}_2}$  is implied by the results of several studies (e.g., (1–3)), but its connection to the mechanisms which drive CO<sub>2</sub>-induced stratospheric cooling is worth making explicit.

### 2. The cooling-to-space approximation for CO<sub>2</sub>

In the main text, we leverage the cooling-to-space (CTS) approximation (section 2 in the main text) to link CO<sub>2</sub>-induced stratospheric cooling to the spectroscopy of CO<sub>2</sub>. The validity of the CTS approximation is closely tied to the rate at which Planck emission  $B(T)$  changes with optical depth  $\tau$  (4). If  $\gamma = \frac{d \ln B}{d \ln \tau}$  is small (on the order of  $\sim 0.1$ ), the CTS approximation is rather strong; as  $\gamma$  increases, the CTS approximation breaks down.

Because CO<sub>2</sub> is well-mixed ( $\beta = 2$ ) and because the lapse rate  $\Gamma$  in the stratosphere is roughly 1.5 km/K, stratospheric emission from the CO<sub>2</sub> band (where  $\alpha = \frac{d \ln B}{d \ln T} \approx 4$ ) changes slowly with optical depth (4):

$$\gamma_{\text{CO}_2} = \frac{d \ln B}{d \ln \tau} = \frac{d \ln B}{d \ln T} \frac{d \ln T}{d \ln p} \frac{d \ln p}{d \ln \tau} = \alpha \frac{R_d \Gamma}{g} \frac{1}{\beta} \approx 4 \frac{287 \text{ J/kg/K} (1.5 \text{ K/km})}{9.8 \text{ m/s}^2} \frac{1}{2} \approx 0.09 \quad [1]$$

Here,  $g$  is the acceleration due to gravity and  $R_d$  is specific gas constant for dry air. Eq. 1 suggests the CTS approximation (Eq. 3 in the main text) is a suitable first-order approximation for the local longwave heating rate due to CO<sub>2</sub> in the stratosphere ( $H_{\text{CO}_2}$ ), a finding in line with previous studies (4–6) and validated by direct comparison to line-by-line computations in Konrad (Fig. S2a).

Due to the linearity implicit in the construction of Eq. 1, the validity of the CTS approximation breaks down near temperature inversions like the stratopause and tropopause (Fig. S2a) where contributions from the inter-atmospheric exchange are large (4). However, since changes in CO<sub>2</sub> concentration yield similar changes in temperature above and below these temperature inversions, radiative heating from the surrounding atmosphere is largely invariant to changes in CO<sub>2</sub> concentration  $q$ , making Eq. 5 in the main text a good approximation for  $\frac{d H_{\text{CO}_2}}{d \ln q}$ , even at the stratopause and tropopause (Fig. S2b).

### 3. Linear parameterizations of CO<sub>2</sub>'s spectroscopy do not capture the magnitude and vertical structure of stratospheric cooling

Commonly, the spectroscopy of CO<sub>2</sub> is simplified using a parameterization in which the log of CO<sub>2</sub>'s mass absorption coefficient  $k_{\text{ref}}$  decays linearly with wavenumber  $\nu$  away from the center of the CO<sub>2</sub> band  $\nu_0$ :

$$k_{\text{ref}} = k_0 e^{-\frac{|\nu - \nu_0|}{l_0}} \quad [2]$$

Here,  $k_0$  is the mass absorption coefficient at the center of the CO<sub>2</sub> band and  $l_0$  is  $\ln k_{\text{ref}}$ 's decay rate in wavenumber space. Such parameterizations have been useful in understanding how CO<sub>2</sub> affects tropospheric longwave cooling (1), hydrological sensitivity (7), and the top-of-atmosphere radiation budget (2, 3, 8). However, parameterizing  $k_{\text{ref}}$  in this manner fails to fully capture the rate at which  $k_{\text{ref}}$  decays with  $\nu$  near the center of CO<sub>2</sub> band (Fig. 2c in the main text), causing CO<sub>2</sub>'s Goldilocks fraction  $l = \int_0^\infty \tau_\nu e^{-\tau_\nu} d\nu$  to fall off rapidly with  $k_{\text{ref}}$ . This transition is particularly sharp when  $l$  is approximated using a Dirac delta function (as in Fig. 2c in the main text), but is also apparent when Goldilocks fraction is computed explicitly:

$$l(p, q) = \int_0^\infty \tau_\nu e^{-\tau_\nu} d\nu = 2l_0 (1 - e^{-\tau_0(p, q)}) \quad [3]$$

Here,  $\tau_0(p, q)$  is the optical depth predicted by Eq. 2 at the center of the CO<sub>2</sub> band for some CO<sub>2</sub> concentration  $q$  at some pressure level  $p$ . Eq. 6 in the main text reduces to Eq. 3 for  $a = 1$  yet has  $a = 0.52$  (see parameter values below) when fitted

to the spectroscopy of CO<sub>2</sub> (gray, Fig. 2 in the main text). This indicates that  $k_{\text{ref}}$  decays with  $\nu$  more rapidly near the center of the CO<sub>2</sub> than Eq. 2 would predict. As a result, Eq. 2 produces stratospheric cooling that is amplified near this transition and near zero elsewhere (Fig. S3).

#### 4. Stratospheric shortwave heating

In the main text, we state that, other than the influence of temperature broadening, which is typically negligible, stratospheric shortwave heating does not change with CO<sub>2</sub> concentration so long as the concentration of shortwave absorbers remains fixed (9). In our Konrad simulations, we hold ozone and stratospheric water vapor concentrations fixed across all runs and, as a result, stratospheric shortwave heating changes very little with CO<sub>2</sub> concentration (Fig. S4).

#### 5. How the heating rates of ozone and water vapor change with CO<sub>2</sub> concentration

In the main text, we capture the impact of water vapor and ozone on CO<sub>2</sub>-induced stratospheric cooling via a simple empirical parameterization (Eq. 10 in the main text):

$$\frac{dH_o}{dT} = C_{\text{strat}} \cos \left( \frac{\pi}{2} \left( \frac{p - p_{\text{strat}}}{p_{\text{tropo}} - p_{\text{strat}}} \right) \right)^2 \quad [4]$$

Here,  $p_{\text{strat}}$  is the pressure at the stratopause and  $p_{\text{tropo}}$  is the pressure at the tropopause. The constant  $C_{\text{strat}}$ , the temperature sensitivity of H<sub>2</sub>O and O<sub>3</sub>'s combined heating rate at the stratopause, is obtained by fitting Eq. 4 to the change in  $H_o$  with temperature predicted by simulations in Konrad (Fig. S5). Because Planck emission grows non-linearly with temperature in the ozone and water vapor bands (a property which Eq. 4 is unable to capture), Eq. 4 generally overpredicts  $\frac{dH_o}{dT}$  at high CO<sub>2</sub> concentration (when stratospheric temperatures are cooler) and underpredicts  $\frac{dH_o}{dT}$  at low CO<sub>2</sub> concentration (when stratospheric temperatures are warmer). Nonetheless, Eq. 4 is sufficient for our purposes, offering a simple way to capture the damping effect of  $\frac{dH_o}{dT}$  on  $\Delta T$ , at least to first order (see Fig. 4 in the main text).

Because changes in stratospheric temperature induce a similar change in the heating rate of CO<sub>2</sub> as they do the combined heating rate of ozone and water vapor, spectral efficiency  $\eta = \frac{dH_{\text{CO}_2}}{dT} / \frac{d(H_{\text{CO}_2} + H_o)}{dT}$  is order 1/2 across the depth of the stratosphere (Fig. S6a). Near the tropopause, however, spectral efficiency increases rapidly as ozone concentration (and its associated longwave emission) goes to zero. This increases lower stratospheric cooling (particularly at low CO<sub>2</sub> concentration, Fig. 4 in the main text), though only minimally because changes in  $l(p, q)$  with CO<sub>2</sub> concentration  $q$  also go to zero near the tropopause.

Spectral efficiency also increases with CO<sub>2</sub> concentration; as CO<sub>2</sub> makes up a larger percentage of the total longwave cooling in the stratosphere, changes in temperature induce a larger change in the heating rate of CO<sub>2</sub> (Fig. S6a). Like  $\eta$ ,  $\alpha = \frac{d \ln B(T, \nu_0)}{d \ln T}$  is roughly constant across the depth of the stratosphere (Fig. S6b), implying that fractional changes in Goldilocks fraction ( $\Delta \ln l$ ) control the vertical structure of stratospheric cooling  $\Delta T$ . Additionally, despite  $\eta$ 's more pronounced  $q$ -dependence, stratospheric cooling depends rather weakly on  $q$  because  $\alpha$ 's (and  $T$ 's)  $q$ -dependence is the opposite sign as  $\eta$ 's (Fig. S6c). In the absence of any change in longwave cooling by other gases ( $\eta = 1$ ), stratospheric cooling is significantly amplified, with each doubling of CO<sub>2</sub> yielding over 20K of cooling at the stratopause (Fig. S7).

#### 6. Parameter Values

For reference, Table S1 lists all of the spectroscopic parameters used in our idealized models.

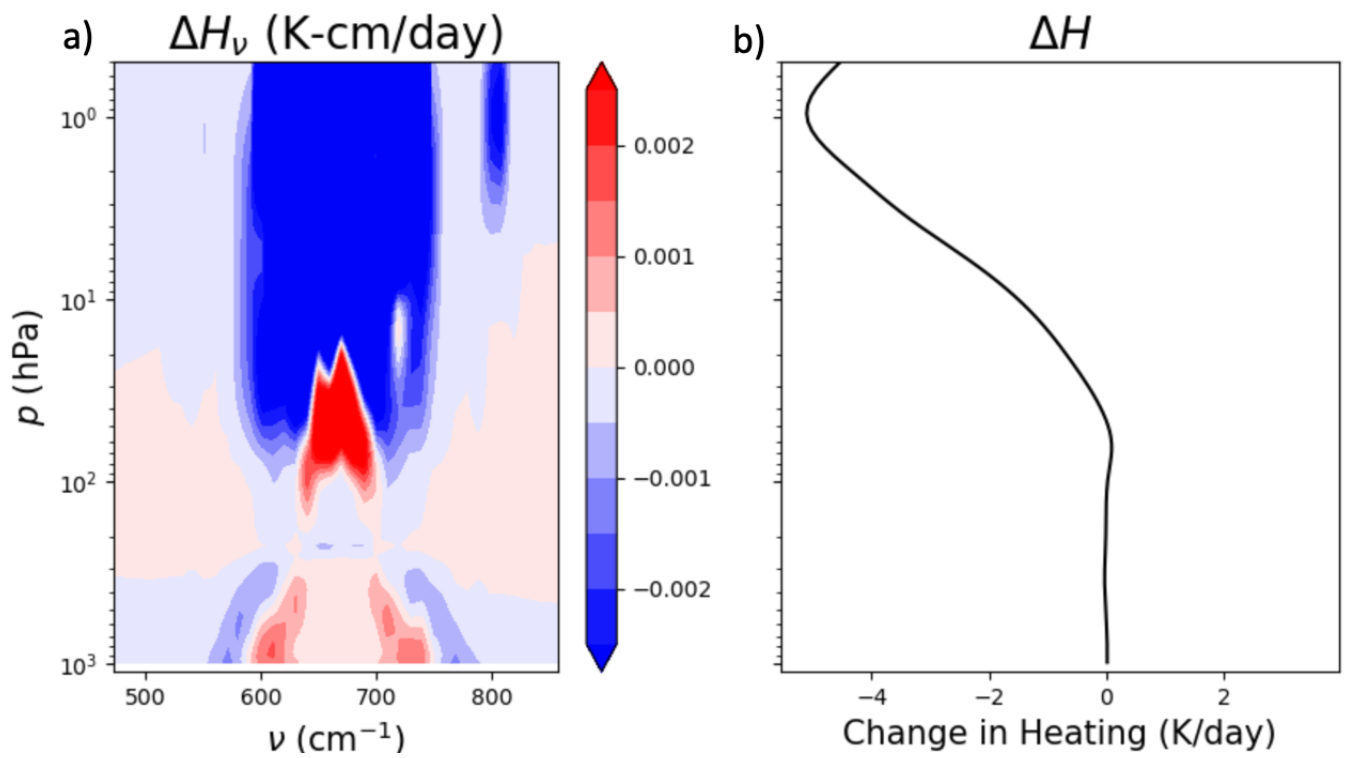

**Fig. S1.** Spectrally-resolved (a) and spectrally-integrated (b) change in heating across the CO<sub>2</sub> band when CO<sub>2</sub> concentration is quadrupled from preindustrial. Temperature is held fixed to the profile which yields radiative convective equilibrium under preindustrial CO<sub>2</sub> concentration (black line in Fig. 1 in the main text).

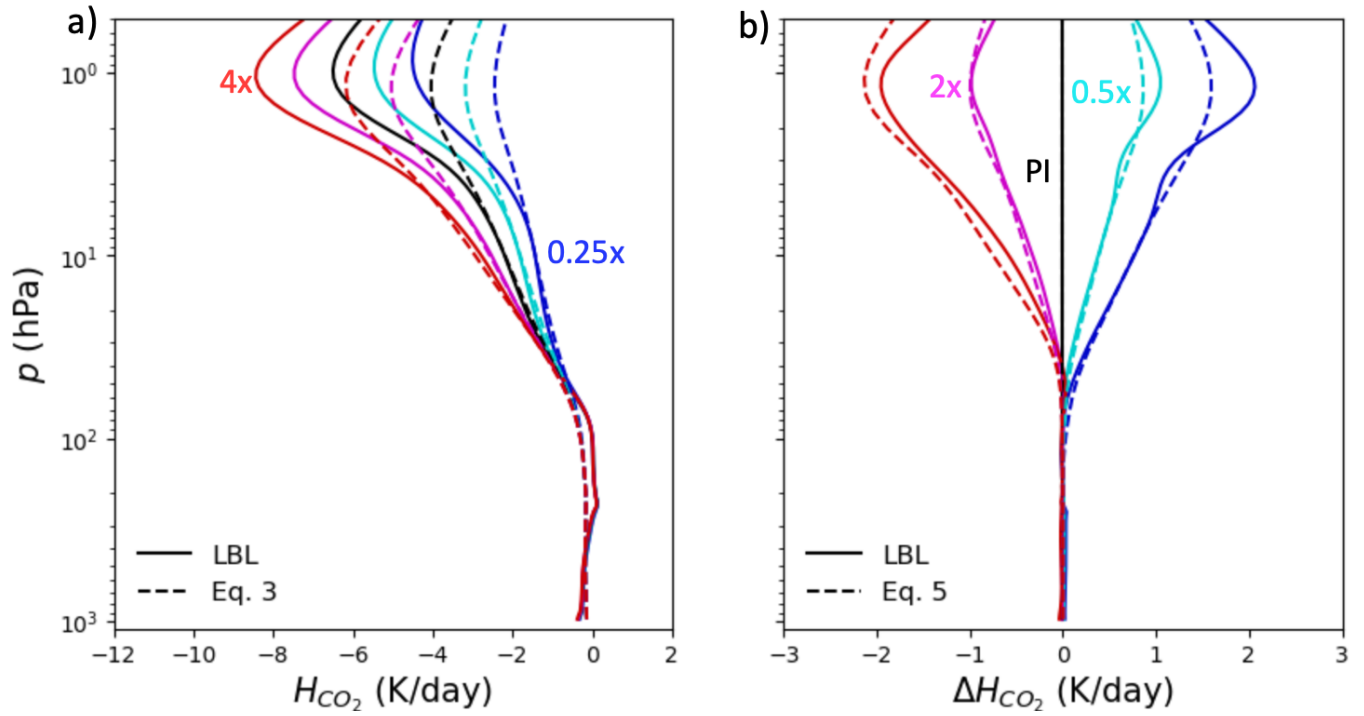

**Fig. S2.** Heating by CO<sub>2</sub> (a) under preindustrial CO<sub>2</sub> concentration (black) and under subsequent doublings (warmer colors) and halvings (cooler colors) of CO<sub>2</sub> concentration from preindustrial (PI) levels. Line-by-line simulations in Konrad (solid) are compared to Eq. 3 in the main text (dashed), an analytical expression derived using the cooling-to-space (CTS) approximation. The CTS approximation is a suitable first-order approximation for  $H_{CO_2}$  in the majority of the stratosphere but breaks down near temperature inversions like the stratopause and tropopause. However, because changes in CO<sub>2</sub> concentration yield similar changes in temperature above and below these temperature inversions, the CTS approximation (Eq. 5 in the main text) generally captures the change in heating by CO<sub>2</sub> with CO<sub>2</sub> concentration (b, same colors and line types) near the stratopause and tropopause.

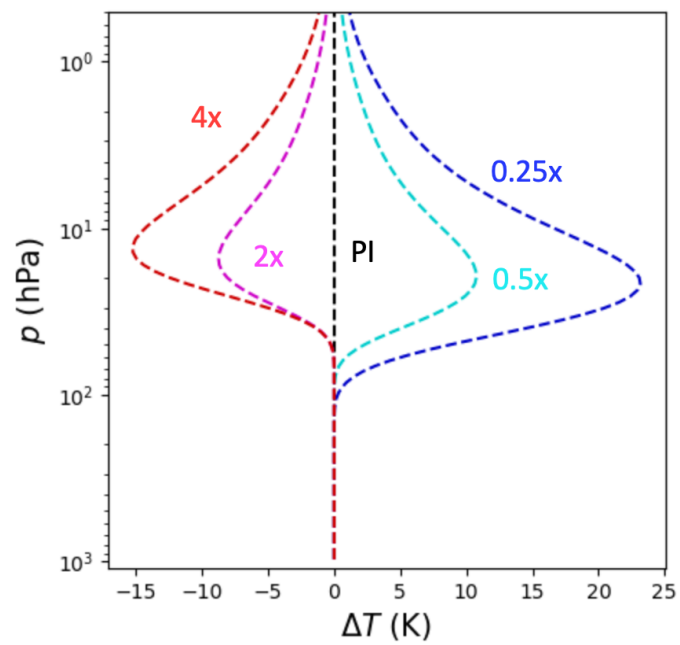

**Fig. S3.** Stratospheric temperature change from preindustrial conditions (black) under subsequent doublings (warmer colors) and halvings (cooler colors) of  $\text{CO}_2$  concentration implied by the linear parameterizations of  $\text{CO}_2$ 's spectroscopy (Eq. 2). Due to the sharp transition in Goldilocks fraction, stratospheric cooling is amplified near  $\tau_0(p, q) = 1$  and near zero elsewhere.

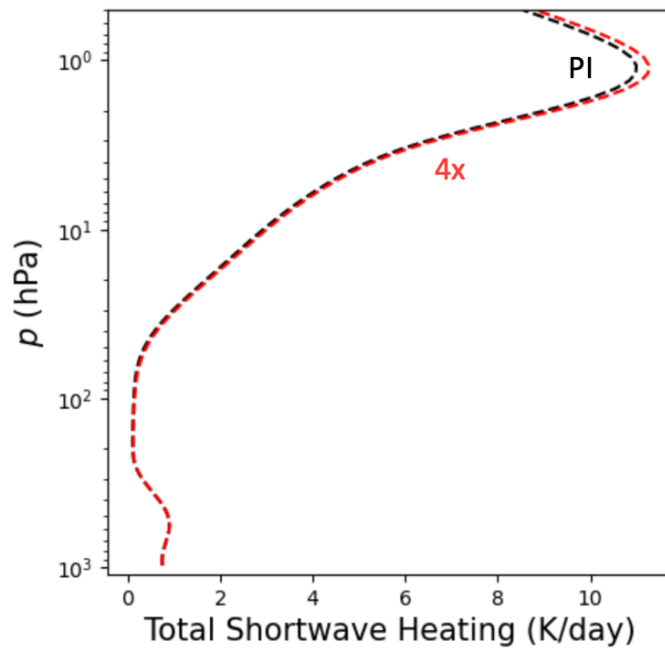

**Fig. S4.** Spectrally-integrated shortwave heating rate under preindustrial CO<sub>2</sub> concentration (black) and after a quadrupling of CO<sub>2</sub> from PI (red). To first order, shortwave heating is invariant to changes in CO<sub>2</sub> concentration.

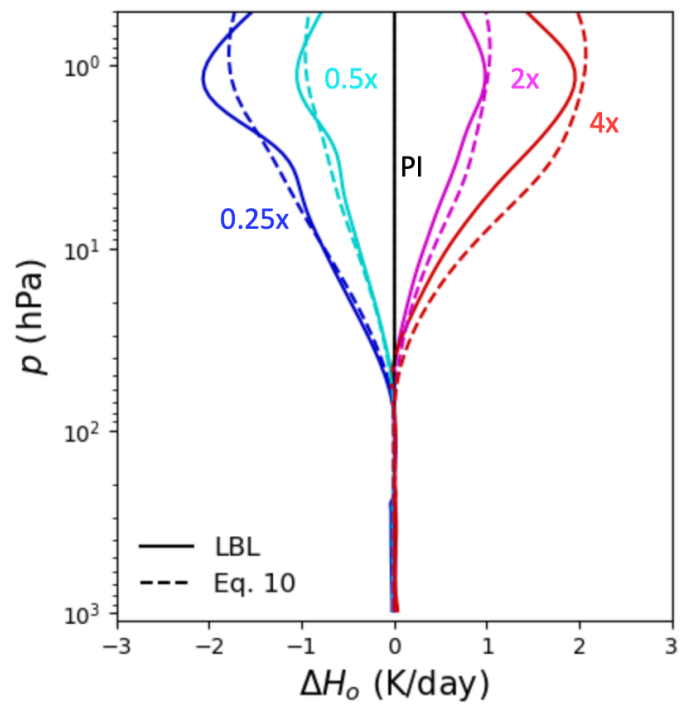

**Fig. S5.** Change in water vapor and ozone's spectrally-integrated heating rate  $\Delta H_o$  from preindustrial  $\text{CO}_2$  concentration (black) under subsequent doublings (warmer colors) and halvings (cooler colors) of  $\text{CO}_2$  concentration. We compare our idealized model (dashed, Eq. 4) to RCE simulations in Konrad (solid).



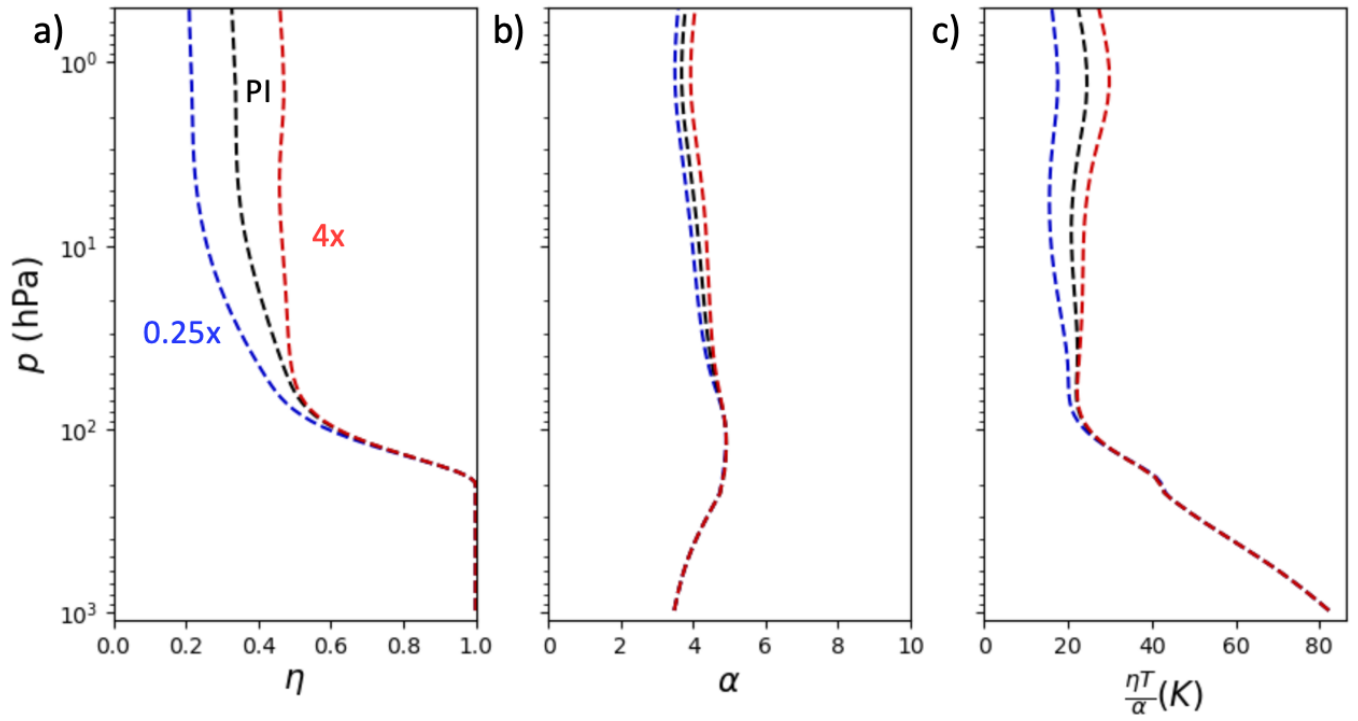

**Fig. S6.** Spectral efficiency  $\eta = \frac{dH_{\text{CO}_2}}{dT} / \frac{d(H_{\text{CO}_2} + H_0)}{dT}$  (a), source scaling  $\alpha = \frac{d \ln B(T, \nu_0)}{d \ln T}$  (b), and the combined effect of these quantities on stratospheric cooling  $\frac{\eta T}{\alpha}$  (c) across the depth of the stratosphere for preindustrial  $\text{CO}_2$  concentration (black) and for a quadrupling (red) and a quartering (blue) of  $\text{CO}_2$  from PI. All quantities are nearly constant throughout the depth of the stratosphere.

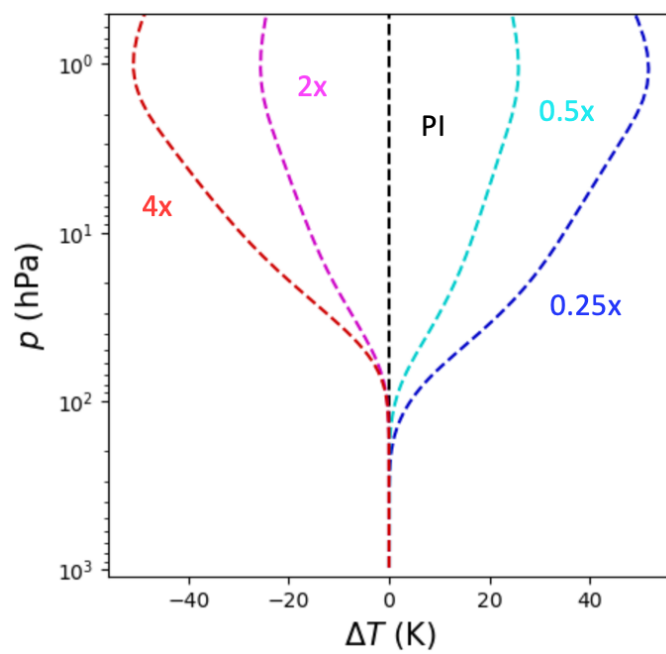

**Fig. S7.** Stratospheric temperature change from preindustrial conditions (black) under subsequent doublings (warmer colors) and halvings (cooler colors) of  $\text{CO}_2$  concentration when longwave cooling by ozone and water vapor is held constant ( $\Delta H_o = 0$ ). Due to the reduced compensation of longwave cooling in other parts of the spectrum, stratospheric cooling is significantly amplified.

**Table S1. List of parameters used in our simple model**

| Parameter          | Description                                                                                                | Assumed Value           |
|--------------------|------------------------------------------------------------------------------------------------------------|-------------------------|
| $D$                | Diffusivity factor                                                                                         | 5/3                     |
| $p_{\text{tropo}}$ | Tropopause pressure level                                                                                  | 200 hPa                 |
| $p_{\text{tropo}}$ | Stratopause pressure level                                                                                 | 1 hPa                   |
| $C_{\text{strat}}$ | Temperature sensitivity of H <sub>2</sub> O and O <sub>3</sub> 's combined heating rate at the stratopause | -0.11 day <sup>-1</sup> |
| $k_0$              | Absorption cross-section at which CO <sub>2</sub> 's Goldilocks fraction begins decaying (at 100hPa)       | 50 m <sup>2</sup> /kg   |
| $l_0$              | Goldilocks fraction at edge of CO <sub>2</sub> band                                                        | 10.2 cm <sup>-1</sup>   |
| $a$                | Relative rate at which CO <sub>2</sub> 's Goldilocks fraction decays with absorption cross-section         | 0.52                    |
| $\nu_0$            | Wavenumber of the peak of the CO <sub>2</sub> band                                                         | 667.5 cm <sup>-1</sup>  |

## References

1. N Jeevanjee, S Fueglistaler, Simple Spectral Models for Atmospheric Radiative Cooling. *J. Atmos. Sci.* **77**, 479–497 (2020).
2. N Jeevanjee, JT Seeley, D Paynter, S Fueglistaler, An Analytical Model for Spatially Varying Clear-Sky CO<sub>2</sub> Forcing. *J. Clim.* **34**, 1–55 (2021).
3. DDB Koll, N Jeevanjee, NJ Lutsko, An Analytic Model for the Clear-Sky Longwave Feedback. *J. Atmos. Sci.* **80**, 1923–1951 (2023).
4. N Jeevanjee, S Fueglistaler, On the Cooling-to-Space Approximation. *J. Atmos. Sci.* **77**, 465–478 (2020).
5. CD Rodgers, CD Walshaw, The computation of infra-red cooling rate in planetary atmospheres. *Q. J. Royal Meteorol. Soc.* **92**, 67–92 (1966).
6. MD Schwarzkopf, SB Fels, The simplified exchange method revisited: An accurate, rapid method for computation of infrared cooling rates and fluxes. *J. Geophys. Res. Atmospheres* **96**, 9075–9096 (1991).
7. S Cohen, R Pincus, A spectroscopic theory for how mean rainfall changes with surface temperature. *Sci. Adv.* **11** (2025).
8. DJ Wilson, J Gea-Banacloche, Simple model to estimate the contribution of atmospheric CO<sub>2</sub> to the earth’s greenhouse effect. *Am. J. Phys.* **80**, 306–315 (2012).
9. S Pinnock, MD Hurley, KP Shine, TJ Wallington, TJ Smyth, Radiative forcing of climate by hydrochlorofluorocarbons and hydrofluorocarbons. *J. Geophys. Res. Atmospheres* **100**, 23227–23238 (1995).
